# Supplementary material for: Identification of CDH23 mutations in Korean families with hearing loss by whole-exome sequencing
Source: PubMed Central journal article supplement (PMC4036425; doi:10.1186/1471-2350-15-46), 2014-04-28
Supplement: 1471-2350-15-46-S3.pdf [file 1471-2350-15-46-S3.pdf]

**Table S1. Results of exome sequencing in two individuals with ARNSHL**

| <b>Parameter</b>                                         | <b>SR-106</b> | <b>SR-209</b> |
|----------------------------------------------------------|---------------|---------------|
| Total reads                                              | 74,947,376    | 80,339,904    |
| Total yield (bp)                                         | 5,845,895,328 | 8,114,330,304 |
| Mappable reads                                           | 69,146,519    | 68,169,703    |
| Mappable yield (bp)                                      | 5,226,122,955 | 6,673,071,263 |
| On-target reads                                          | 39,345,288    | 43,497,122    |
| On-target yield (bp)                                     | 2,343,468,939 | 3,474,691,342 |
| Coverage of target region (more than 10×)                | 90%           | 91%           |
| Mean read depth of targeted region                       | 53.2×         | 79×           |
| Mean read depth of called variants                       | 47×           | 52×           |
| Number of total variants                                 | 56,508        | 62,671        |
| Number of coding variants                                | 20,780        | 20,100        |
| Number of missense, nonsense, splice, and indel variants | 10,656        | 9,912         |
| After Korean control exome* filtering                    | 665           | 533           |
| After dbSNP131 filtering                                 | 579           | 480(dbSNP135) |
| Variants in reported deaf genes                          | 3             | 4             |
| Recessive (at least two variant in a gene)               | 1             | 1             |

\* Korean control exome dataset, which includes exome data for 30 Koreans from another study and the Korean genomes database, TIARA.

**Table S2. List of the 55 deafness genes that were used to filter variants**

|    | <b>Locus (OMIM)</b> | <b>Location</b> | <b>Gene (OMIM)</b> | <b>Type</b>        |
|----|---------------------|-----------------|--------------------|--------------------|
| 1  | DFNA20              | 17q25           | <i>ACTG1</i>       | dominant           |
| 2  | DFNB73              | 1p32.3          | <i>BSND</i>        | recessive          |
| 3  | DFNA44              | 3q28-29         | <i>CCDC50</i>      | dominant           |
| 4  | DFNB12              | 10q21-q22       | <i>CDH23</i>       | recessive          |
| 5  | DFNB29              | 21q22           | <i>CLDN14</i>      | recessive          |
| 6  | DFNA9               | 14q12-q13       | <i>COCH</i>        | dominant           |
| 7  | DFNA13,DFNB53       | 6p21            | <i>COL11A2</i>     | dominant,recessive |
| 8  | DFNA5               | 7p15            | <i>DFNA5</i>       | dominant           |
| 9  | DFNA1               | 5q31            | <i>DIAPH1</i>      | dominant           |
| 10 | DFNA39              | 4q21.3          | <i>DSPP</i>        | dominant           |
| 11 | DFNB36              | 1p36.3          | <i>ESPN</i>        | recessive          |
| 12 | DFNB35              | 14q24.1-24.3    | <i>ESRRB</i>       | recessive          |
| 13 | DFNA10              | 6q22-q23        | <i>EYA4</i>        | dominant           |
| 14 | DFNA3A,DFNB1        | 13q11-q12       | <i>GJB2</i>        | dominant,recessive |
| 15 | DFNA2B              | 1p35.1          | <i>GJB3</i>        | dominant           |
| 16 | DFNA3B              | 13q12           | <i>GJB6</i>        | dominant           |
| 17 | DFNB32              | 1p13.3-22.1     | <i>GPSM2</i>       | recessive          |
| 18 | DFNB25              | 4p13            | <i>GRXCR1</i>      | recessive          |
| 19 | DFNB39              | 7q21.1          | <i>HGF</i>         | recessive          |
| 20 | DFNA2A              | 1p34            | <i>KCNQ4</i>       | dominant           |
| 21 | DFNB66/67           | 6p21.2-22.3     | <i>LHFPL5</i>      | recessive          |
| 22 | DFNB77              | 18q12-q21       | <i>LOXHD1</i>      | recessive          |
| 23 | DFNB63              | 11q13.2-q13.4   | <i>LRTOMT</i>      | recessive          |
| 24 | DFNB49              | 5q12.3-q14.1    | <i>MARVELD2</i>    | recessive          |
| 25 | DFNA4               | 19q13           | <i>MYH14</i>       | dominant           |
| 26 | DFNA17              | 22q             | <i>MYH9</i>        | dominant           |
| 27 | DFNB3               | 17p11.2         | <i>MYO15A</i>      | recessive          |
| 28 | DFNA48              | 12q13-q14       | <i>MYO1A</i>       | dominant           |
| 29 | DFNB30              | 10p11.1         | <i>MYO3A</i>       | recessive          |
| 30 | DFNA22,DFNB37       | 6q13            | <i>MYO6</i>        | dominant,recessive |
| 31 | DFNB22              | 16p12.2         | <i>OTOA</i>        | recessive          |
| 32 | DFNB9               | 2p22-p23        | <i>OTOF</i>        | recessive          |
| 33 | DFNB23              | 10p11.2-q21     | <i>PCDH15</i>      | recessive          |
| 34 | DFNB59              | 2q31.1-q31.3    | <i>DFNB59</i>      | recessive          |
| 35 | DFNX2 (DFN3)        | Xq21.1          | <i>POU3F4</i>      | X-linked           |
| 36 | DFNA15              | 5q31            | <i>POU4F3</i>      | dominant           |
| 37 | DFNX1 (DFN2)        | Xq22            | <i>PRPS1</i>       | X-linked           |
| 38 | DFNB24              | 11q23           | <i>RDX</i>         | recessive          |
| 39 | DFNB4               | 7q31            | <i>SLC26A4</i>     | recessive          |
| 40 | DFNB61              | 7q22.1          | <i>SLC26A5</i>     | recessive          |
| 41 | DFNB16              | 15q21-q22       | <i>STRC</i>        | recessive          |
| 42 | DFNA12,DFNB21       | 11q22-24        | <i>TECTA</i>       | dominant,recessive |
| 43 | DFNA28              | 8q22            | <i>GRHL2</i>       | dominant           |
| 44 | DFNA51              | 9q21            | <i>TJP2</i>        | dominant           |
| 45 | DFNA36,DFNB7/11     | 9q13-q21        | <i>TMC1</i>        | dominant,recessive |
| 46 | DFNB6               | 3p14-p21        | <i>TMIE</i>        | recessive          |
| 47 | DFNB8/DFNB10        | 21q22           | <i>TMPRSS3</i>     | recessive          |
| 48 | DFNB28              | 22q13           | <i>TRIOBP</i>      | recessive          |
| 49 | DFNB79              | 9q34.3          | <i>TPRN</i>        | recessive          |

|    |              |             |               |                    |
|----|--------------|-------------|---------------|--------------------|
| 50 | DFNB18       | 11p14-15.1  | <i>USH1C</i>  | recessive          |
| 51 | DFNA6        | 4p16.3      | <i>WFS1</i>   | dominant           |
| 52 | DFNB31       | 9q32-q34    | <i>DFNB31</i> | recessive          |
| 53 | DFNA50       | 7q32.2      | <i>MIR96</i>  | dominant           |
| 54 | DFNA11,DFNB2 | 11q12.3-q21 | <i>MYO7A</i>  | dominant,recessive |
| 55 | DFNB84       | 12q21.2     | <i>PTPRQ</i>  | recessive          |

---

**Table S3. Candidate variants identified in this study.**

|        | <b>Genomic positions<br/>(Hg19)</b> | <b>Gene</b>  | <b>Nucleotide change</b> | <b>Protein change</b>      | <b>Status</b>      |
|--------|-------------------------------------|--------------|--------------------------|----------------------------|--------------------|
| SR-106 | Chr2:26707353                       | <i>OTOF</i>  | c.T1194A                 | p.Asp398Glu                |                    |
|        | Chr10:73330641                      | <i>CDH23</i> | c.C719T                  | p.Pro240Leu                | Causative mutation |
|        | Chr10:73501616                      | <i>CDH23</i> | c.G4783A                 | p.Glu1595Lys               | Causative mutation |
| SR-209 | Chr4:88536459                       | <i>DSPP</i>  | c.2645_2646insTAGTGACAG  | p.Ser882delinsSerSerAspSer |                    |
|        | Chr10:73330641                      | <i>CDH23</i> | c.C719T                  | p.Pro240Leu                | Causative mutation |
|        | Chr10:73377041                      | <i>CDH23</i> | c.A1025G                 | p.Asn342Ser                | Causative mutation |
|        | Chr12:57431829                      | <i>MYO1A</i> | c.G1785T                 | p.Gln595His                |                    |
